# Supplementary material for: Real-world application of a scalable school-based physical activity intervention: A cross-sectional survey of the implementation of The Daily Mile in Greater London primary schools
Source: PLOS journal article supplement (doi:10.1371/journal.pone.0288500), 2023-08-09
Supplement: S6 (10.1371/journal.pone.0288500.s006) [file journal.pone.0288500.s006]

**S3 Table. Characteristics of schools that did and did not complete the survey**

| Schools                                              | Completed<br>n=369(% <sup>a</sup> ) | Not completed<br>n=1348(% <sup>a</sup> ) | All Schools<br>n=1717(% <sup>a</sup> ) | p value <sup>b</sup> |
|------------------------------------------------------|-------------------------------------|------------------------------------------|----------------------------------------|----------------------|
| Type of school <sup>1</sup>                          |                                     |                                          |                                        |                      |
| Academy converter                                    | 56 (15)                             | 195 (14)                                 | 251 (15)                               | 0.06                 |
| Academy sponsor led                                  | 16 (4)                              | 95 (7)                                   | 111 (6)                                |                      |
| Community                                            | 187 (51)                            | 648 (48)                                 | 835 (49)                               |                      |
| Foundation                                           | 15 (4)                              | 26 (2)                                   | 41 (2)                                 |                      |
| Free                                                 | 16 (4)                              | 44 (3)                                   | 60 (3)                                 |                      |
| Voluntary aided                                      | 78 (21)                             | 336 (25)                                 | 414 (24)                               |                      |
| Voluntary controlled                                 | 1 (0.3)                             | 4 (0.3)                                  | 5 (0.3)                                |                      |
| Total Pupil Numbers <sup>2</sup>                     |                                     |                                          |                                        |                      |
| <99                                                  | 3 (0.8)                             | 10 (0.7)                                 | 13 (0.8)                               | 0.24                 |
| 100 to 499                                           | 292 (79)                            | 1059 (79)                                | 1351 (79)                              |                      |
| 500 to 999                                           | 74 (20)                             | 264 (20)                                 | 338 (20)                               |                      |
| >=1000                                               | 0                                   | 15 (1)                                   | 15 (0.9)                               |                      |
| School gender <sup>1</sup>                           |                                     |                                          |                                        |                      |
| Mixed                                                | 1 (0.3)                             | 3 (0.2)                                  | 1711 (99)                              | 0.61                 |
| Boys                                                 | 1 (0.3)                             | 1 (0.1)                                  | 4 (0.2)                                |                      |
| Girls                                                | 367 (99)                            | 1344 (99)                                | 2 (0.1)                                |                      |
| Pupil's eligible for SEN support <sup>2</sup>        |                                     |                                          |                                        |                      |
| <=99                                                 | 358 (97)                            | 1272 (94)                                | 1630 (95)                              | 0.22                 |
| 100 to 199                                           | 11 (3)                              | 74 (5)                                   | 85 (5)                                 |                      |
| 200 to 299                                           | 0                                   | 1 (0.1)                                  | 1 (0.1)                                |                      |
| >=300                                                | 0                                   | 1 (0.1)                                  | 1 (0.1)                                |                      |
| Pupil's with English as second language <sup>2</sup> |                                     |                                          |                                        |                      |
| <=99                                                 | 95 (26)                             | 418 (31)                                 | 513 (30)                               | 0.09                 |
| 100 to 499                                           | 260 (70)                            | 868 (64)                                 | 1128 (66)                              |                      |
| 500 to 1000                                          | 14 (4)                              | 62 (5)                                   | 76 (4)                                 |                      |
| Pupil's eligible for free school meals <sup>2</sup>  |                                     |                                          |                                        |                      |
| <=99                                                 | 269 (73)                            | 838 (62)                                 | 1107 (64)                              | 0.001                |
| 100 to 199                                           | 92 (25)                             | 442 (33)                                 | 534 (31)                               |                      |
| 200 to 299                                           | 8 (2)                               | 58 (4)                                   | 66 (4)                                 |                      |
| 300 to 399                                           | 0                                   | 10 (1)                                   | 10 (1)                                 |                      |
| OFSTED* rating <sup>1 3</sup>                        |                                     |                                          |                                        |                      |
| Outstanding                                          | 87 (24)                             | 310 (23)                                 | 397 (23)                               | 0.73                 |
| Good                                                 | 253 (67)                            | 914 (68)                                 | 1167 (68)                              |                      |
| Requires improvement                                 | 15 (4)                              | 55 (4)                                   | 70 (4)                                 |                      |
| Inadequate                                           | 0                                   | 5 (0.4)                                  | 5 (0.3)                                |                      |
| Rating not available                                 | 14 (4)                              | 64 (5)                                   | 78 (5)                                 |                      |
| Area deprivation IDACI <sup>4</sup> (quintiles)      |                                     |                                          |                                        |                      |
| (Most deprived) 1                                    | 39 (11)                             | 240 (18)                                 | 279 (16)                               | 0.05                 |
| 2                                                    | 93 (25)                             | 350 (26)                                 | 443 (26)                               |                      |
| 3                                                    | 83 (22)                             | 244 (18)                                 | 327 (19)                               |                      |
| 4                                                    | 100 (27)                            | 305 (23)                                 | 405 (24)                               |                      |
| (Least deprived) 5                                   | 54 (15)                             | 209 (16)                                 | 263 (15)                               |                      |

<sup>a</sup>May not total 100% due to rounding<sup>b</sup>Chi-square test<sup>1</sup>Source: <https://www.gov.uk/government/statistics/schools-pupils-and-their-characteristics-january-2021><sup>2</sup>Source: <https://www.gov.uk/government/collections/statistics-performance-tables><sup>3</sup>Ofsted rating of 'Inadequate' includes schools that are rated 'Serious Weaknesses' or 'Special Measures'<sup>4</sup>IDACI: Income Deprivation Affecting Children Index

\*Ofsted, The Office for Standards in Education, Children's Services and Skills
